# Supplementary material for: Involving community in genes and pathway curation
Source: Oxford University Press journal article supplement (doi:10.1093/database/bay146), 2018-12-20
Supplement: bay146_supp.zip [file bay146_supp.zip]

Archive with 5 entries (5 files):
- Naithani-et-al-2018-database-Table 1-Revised.docx
- Naithani-et-al-Figure1_09-05-2018.pdf
- Naithani-et-al-Figure1_09-05-2018.pptx
- Naithani-et-al-manuscript-Database-12-10-2018_R2.docx
- Naithani-et-al-Supplementary text_DATABASSE-2018.docx
