# Supplementary material for: Involving community in genes and pathway curation
Source: Oxford University Press journal article supplement (doi:10.1093/database/bay146), 2018-12-20
Supplement: bay146_supp.zip [file bay146_supp.zip › Naithani-et-al-2018-database-Table 1-Revised.docx]

**Table 1. Strategy, workflow and outcomes of the 2018 pathway jamboree**

| **1. Data gathering on excel sheet** | | | |
| --- | --- | --- | --- |
| **Data type** | **Specific task** | **Curation outcomes** | **Learning outcomes** |
| Literature review  (3-4 hours/ article) | Research articles on five pathways: Arsenic transport, HSFA7 gene regulatory network involved in drought response, heat response, cold response, and endosperm development were selected to identify: i) genes associated with a pathway or biological process, and ii) gene-gene or gene-protein interaction. | From 7 research articles a list of 200 genes was extracted; 6 gene-gene interactions involved in heat stress were identified; and a network of HSFA7 transcription factor consisting of 35 genes was deduced. | Graduate students found the critical review of literature useful in their own research. |
| Gene IDs conversion  (2-3 mins/gene) | Participants were instructed to convert old gene IDs (e.g. MSU gene ID) to the standard RAP gene IDs using this tool: <https://rapdb.dna.affrc.go.jp/tools/converter>. | 196 gene IDs were converted. 4 MSU genes do not have corresponding genes in RAP. | Provided insights into the value of consistency in gene nomenclature, and synthesis of knowledge. |
| Transcript IDs  (2 min/transcript) | Ensembl transcript IDs were used for depicting transcription events. | 36 transcript IDs were extracted. | Showed how to get transcript Ids. |
| UniProt IDs  (5 min/gene) | To acquire a protein IDs and annotation for a specific gene product from UniProt ([https://www.uniprot.org)](about:blank). | 189 UniProt IDs were mapped to RAP genes. | Learned that genomic resources are not perfect and are a work in progress. |
| Subcellular location within a plant cell  (5-15 min/protein) | The default location of genes and transcripts is nucleus. To assign subcellular location to a protein, experimental evidence from literature or prediction from the compendium of crop Proteins with Annotated Locations (cropPAL)  (<http://crop-pal.org)> or TargetP analysis (<http://www.cbs.dtu.dk/services/TargetP)> was used. | 189 proteins were assigned subcellular location. This provides enrichment of annotation. | Students found these tools to be useful for their own research project. |
| Transmembrane domain(s)  (5 min/protein) | TMHMM (<http://www.cbs.dtu.dk/services/TMHMM/)> was used for prediction of transmembrane helices in proteins. | 26 were found to be transmembrane proteins. | This is a useful exercise to enrich protein annotation. |
| GO  (2-3 min/gene) | Assign GO terms | GO terms were assigned to 36 transcription events and in the case of proteins, were extracted from UniProt. | Learned about the utility of ontologies in curation. |
| Molecular interactions  (15 min) | Summarized interaction data | Discussed a transcription network of 36 genes and another network of 6 genes, which emerged from literature review. | Learned how false-positive protein-protein interactions can be identified by considering their subcellular location. |
| Reaction  (10 min) | Showed how to assign a reaction to a gene and protein. | Metabolic / transport / translocation / transcription / binding events were illustrated on whiteboard. | How different types of reactions can be depicted in pathways. |
| Pathway  (10 min) | Showed how to assemble various reactions into a pathway, and to associate them with complex biological processes (i.e. development of plant organs and tissues, plant’s response to abiotic stress). | As an example, the gene regulatory network of HSFA7 was associated with ABA-dependent drought response. | How to integrate information from various sources to create a pathway. |
| Summary  (15-30 min/ summary) | Create a summary of genes and pathways with citation. | In total, summaries of 20 genes and 5 pathways were composed. | Critical review of data from literature. |
| **2. Visualization of a biological pathway and reactions** | | | |
| **Idea** | **Activity** | **Curation outcome** | **Learning outcomes** |
| Discussed how various macromolecular interactions can be depicted in the form of a series of connected reactions  (2 hour) | 15-min whiteboard presentation by each participant. | The rough outline of 5 pathway diagrams were created. | This exercise was highly appreciated by all participants. Beyond biocuration exercise, it helped them in building data-driven hypotheses and refining their own research projects. |
| **3. Drawing pathways and reactions using pathway curation tools** | | | |
| **Tool** | **Activity** | **Curation outcome** | **Learning outcomes** |
| PathVisio tool  (1 hour) | Showed curation of gene-gene network involved in rice response to biotic stress. | The curated pathway was deposited in WikiPathways | Participants found this to be a useful resource. |
| Introduction to Plant Reactome analysis tools and the Reactome Curator Tool  (6 hours) | Short introduction to Plant Reactome.  Introduction to the Reactome Curator Tool by showing the step-by-step curation of an arsenic transport pathway.  Participants curated pathways of interest with one-on-one assistance provided by organizers. | Curation of arsenic transport pathway.  Curation of one gene-regulatory pathway and partial curation of three additional pathways. | Participants found Plant Reactome to be a useful resource for the analysis of large-scale gene expression datasets, and the Reactome Curator Tool to be the most sophisticated pathway curation platform. |
