# Supplementary material for: Involving community in genes and pathway curation
Source: Oxford University Press journal article supplement (doi:10.1093/database/bay146), 2018-12-20
Supplement: bay146_supp.zip [file bay146_supp.zip › Naithani-et-al-manuscript-Database-12-10-2018_R2.docx]

**Title: Involving community in genes and pathway curation**

Sushma Naithani1*, Parul Gupta1, Justin Preece1, Priyanka Garg1,Valerie Fraser1,2, Lillian K. Padgitt-Cobb3, Matthew Martin1, Kelly Vining4, and Pankaj Jaiswal1

1Department of Botany and Plant Pathology, Oregon State University, Corvallis, OR, 97331, USA

2Molecular and Cellular Biology Graduate Program, Oregon State University, Corvallis, Oregon, USA

3Department of Biochemistry and Biophysics, Oregon State University, Corvallis, OR, 97331, USA

4Department of Horticulture, Oregon State University, Corvallis, OR, 97331, USA

*Corresponding Author: Dr. Sushma Naithani

Address: 2082 Cordley Hall, Department of Botany and Plant Pathology, Oregon State University, Corvallis, OR-97331, USA

Phone: +1-541-231-6376

Email: naithans@science.oregonstate.edu

**Abstract**

Biocuration plays a crucial role in building databases and complex systems-level platforms required for processing, annotating, and analyzing ‘Big Data’ in biology. However, biocuration efforts cannot keep pace with a dramatic increase in the production of omics data; this presents one of the bottleneck in genomics. In two pathway curation jamborees, Plant Reactome curators tested strategies for introducing researchers to pathway curation tools, harnessing biologists’ expertise in curating plant pathways, and developing a network of community biocurators. We summarize the strategy, workflow and outcomes of these exercises, and discuss the role of community biocuration in advancing databases and genomic resources.

Plant Reactome Database URL: <http://plantreactome.gramene.org>

**Introduction**

Big Data generation in biology is becoming easier, cheaper, and faster. However, scientists need cyber-infrastructure and platforms capable of providing a systems-level framework (genomic context) for visualization and analysis of high-throughput omics data in order to unleash the full potential of the data – which in turn can provide useful insights for translational research (see Figure 1). These systems-level platforms such as Ensembl-Gramene (1), Phytozome (2), Kyoto Encyclopedia of Genes and Genomes (KEGG) (3), Reactome (4), Plant Reactome (5), BioCyc (6) and species-specific metabolic networks (*i.e.* Plant Metabolic Network (7), RiceCyc (8), MaizeCyc (9), VitisCyc (10), FragariaCyc (11) etc.) allow integration of various automated, semi-automated, and/or manual biocuration pipelines, and provide researchers a user-friendly framework based on data mining, back-end data processing, and biocuration.

**(Please Place Figure 1 Here)**

Biocuration is a time-intensive process that involves the creation of a user-friendly narrative of biological information based on the review, analysis and systematic organization of biological data from various sources using manual and/or semi-automated methods (12-14). Currently, biocuration of genomic data is one of the factors limiting progress in genomics, due to limited financial support for biocuration and a shortage of trained curators (15-18). Powerful gene orthology-based algorithms are available for projecting gene annotations from model species to other species (1,5,19,20), and some progress has been achieved in automated text mining (21-23). However, the reliable alternative of a trained biocurator, who can synthesize a new knowledge by integrating diverse data types, does not yet exist. Engaging and training the researchers and database users in biocuration could be a long-term solution for breaking this barrier and sustaining various biological knowledgebase(s) (18).

Gramene (<http://gramene.org>) has worked with the community of plant researchers and supported efforts in standardizing and formatting data sets accurately for deposition in the public repositories for long-term utilization, re-use, re-analysis and interoperability (24,25). In order to engage the community for biocuration of genes and pathways, we have organized two pathway curation jamborees in 2017 and 2018 at Oregon State University. The aim of these jamborees was to introduce plant researchers to biocuration strategies and tools, develop a network of biologists for community curation, and harness their expertise for curation and peer-review of Plant Reactome pathways.

Here, we summarize a successful biocuration jamboree (design, process, workflow and outcomes), and discuss strategies for enhancing the participation of the plant research community in biocuration of genes, proteins and pathways.

**Pathway biocuration jamboree: design and implementation**

We organized a pathway curation jamboree in connection with the 2018 International Conference on Biological Ontology. Results of previous one-on-one work with individual biologists, and a small jamboree at 2017 International Ontology Consortium meeting suggested that successful training required a well-defined project, multiple training sessions spread over several days, and a gradual introduction of tasks associated with the curation process to lead participants from familiar chores such as literature review to more specialized aspects of data organization and entry. One week prior to the jamboree, Gramene curators shared a list of 10 pathways (4-5 research articles associated with each pathway) with the participants and offered them the opportunity to add pathways or articles of their choice for curation. A pre-survey to participants was sent to assess their expertise, familiarity with biocuration, and expectations from the jamboree. To accommodate the needs of participants who were only interested in the curation process but not in the literature review (or had time commitment conflicts), our curators prepared a list of 300 rice genes associated with abiotic stress pathways.

For the Jamboree itself, we planned a four-day (20-hour) curation workshop, where participants could participate at their own pace while attending other activities at the conference. We opted for a ‘knowledge-centric’ focus for this workshop (as opposed to ‘tool-centric’). The biocuration exercise began with a simplified approach that employed the strengths of biologists (literature review, gathering data, evaluating evidence, and synthesizing knowledge). We then compartmentalized various tasks: enrichment of gene annotations, making gene-gene connections, and manual pathway illustration, followed by using PathVisio and the Reactome Curator Tool. We provided individual help in navigating concepts and tools.

Table 1 summarizes the strategy, approach and outcomes of the 2018 Biocuration Jamboree. In the first step, the participants were asked to gather a list of genes and summaries in Excel sheets based on their literature review. We then discussed the importance of standardized gene ids, and instructed participants to resolve gene ID conflicts in the rice genes associated with their assigned pathway.

Historically, after the completion of the Oryza sativa ssp. japonica cv. Nipponbare genome sequencing (26), two projects, the Michigan State University Rice Genome Annotation Project (MSU project; <http://rice.plantbiology.msu.edu)> (27) and Rice Annotation Project (RAP; <https://rapdb.dna.affrc.go.jp)> (28) simultaneously led rice gene annotation efforts. At present, the RAP system prevails, but both gene nomenclature systems (gene locus IDs) are in use. At Plant Reactome/Gramene, we use standard RAP gene nomenclature. Thus, to summarize rice literature a curator often has to first convert an MSU gene ID (e.g. LOC_Os03g44380) into a corresponding RAP gene ID (e.g. Os03g0645900) using a gene converter tool (available at <https://rapdb.dna.affrc.go.jp/tools/converter>). In literature, we also find other types of gene IDs in use (i.e. GenBank accession numbers, gene array/probe identifiers, and cDNA), which makes it difficult to map on a standard gene ID, and requires sequence search analysis (*e.g.* using BLAST).

Furthermore, we showed how to acquire information on the gene product (protein) from UniProt (<https://www.uniprot.org)>. Currently, one rice gene ID corresponds to one or more protein IDs in UniProt. Using the options provided by UniProt’s search feature, we select the best match based on quality criteria (*i.e.* “gold star” sets, 6-digit IDs, longest proteins, and preferably from rice proteome dataset). The participants were also instructed on how to acquire additional information on the subcellular location and membrane association of proteins. Gene Ontology (GO) annotations for proteins were automatically imported from UniProt into the Reactome Curator Tool. GO annotations to transcripts of 36 genes associated with the heat shock transcription factor *HSFA7* gene-regulatory network (29) were added manually.

In the second step, we asked participants to depict various macromolecular interactions in the form of a series of connected or isolated reactions to describe gene-gene interactions. These reactions were then grouped in a pathway and associated with a biological process (illustrated either on paper or using PowerPoint). Each participant was asked to summarize their work and other participants were encouraged to add or suggest modifications. Finally, trained Gramene curators provided their suggestions on how to connect information from one publication to another and extend the gene-gene interaction network or pathway. Where the discreet knowledge of a reaction was not available, event types were depicted as BlackBoxEvents.

Once the participants had gathered the required data and visualized the macromolecular interactions graphically, we began pathway curation using PathVisio ([https://www.pathvisio.org](https://www.pathvisio.org/)), a free, simple open-source application developed by WikiPathways [15]. We encourage researchers to take advantage of training material available at <http://academy.wikipathways.org> to generate pathway figures and share their knowledge with the community using the WikiPathways platform [15].

In the last step, we introduced participants to the Plant Reactome database (5) and its analytical capabilities applicable to their research. Finally, we used the Reactome Curator Tool (<https://reactome.org/download-data/reactome-curator-tool>) to demonstrate step-by-step curation of arsenic uptake and detoxification in rice. The learning curve for the Reactome Curator Tool is typically quite steep and it takes our curators 4-6 months to get acquainted with all aspects of it. By introducing the Reactome Curator Tool in this manner, we were able to focus on the biological content of pathway curation, while still laying the groundwork for future in-depth training on the Plant Reactome platform.

**(Please place Table 1 here)**

**Curation and learning outcomes**

In total, 20 participants registered for the pathway biocuration jamboree in 2018, but due to various parallel workshops and other activities in the conference only 8 participated including 1 professor, 1 postdoc, 5 graduate students and 1 research assistant, who devoted 4-20 hours to curating rice genes and pathways. The participants mined genes from 7 published papers, provided detailed annotations for 200 genes, and curated one complete regulatory pathway (*HSFA7* gene network) and three partial pathways for the Plant Reactome database. The curated data was attributed to their name in the pathway curation tool and the same will be preserved when the data are made publically available. In addition, 2 professors working only in non-plant species spent time learning pathway curation strategies, but did not contribute to the curation.

Interestingly, one graduate student opted to work on a script that can automatically populate data in an Excel sheet by pulling gene IDs and UniProt IDs. The script (available at <https://github.com/mttmartin/uniprot_lookup>) does a good job of automatically mapping MSU gene IDs to RAP gene IDs and pulling the corresponding UniProt IDs where only one gene ID is mapped to one UniProt ID. However, it fails to select the appropriate UniProt ID when more than one options are available. This program is useful for automating some aspects of manual pathway curation and can be a part of our ongoing effort to map one gene to one UniProt reference accession for the canonical peptide form. The student’s computational contribution was a useful surprise. We learned that community contribution can come in many forms and workshops such as this can be a collaborative learning space.

Beyond curation for Plant Reactome, the participants found this exercise very useful and directly applicable to their own research. Graduate students, in particular, liked the critical review of literature, identifying well-curated from non-curated data in public databases, and appreciated the standardized gene nomenclature concept for an organism. Participants working with non-model organisms also appreciated the concepts of GO, consistency in gene nomenclature, and the ability to draw pathways for their organisms in PathVisio to share with the community. The participants also found Plant Reactome and WikiPathways as useful resources for analysis of their own research data (see supplementary text). Scientists frequently use curated information available in various databases. This jamboree provided participants an opportunity to learn about the biocuration process and protocols that are required for building and improving genomic resources.

**Community biocuration: challenges and opportunities**

As a long-term strategy, community curation can help to build secondary resources at a fast pace. However, significant resources are needed to train researchers in curation before this activity becomes useful and productive. Therefore, existing databases should have a mandate to train the community and allocate resources for such activities. Conference sites are ideal for conducting biocuration workshops and recruiting curators from a large, diverse pool of researchers, and also for economizing resources. We were able to conduct two curation workshops at our host institute, in conjunction with the 2017 Gene Ontology Consortium meeting, and again at the 2018 International Conference on Biological Ontology. Participants in these conferences are acquainted with, or at least interested in, the challenges of handling Big Data and are actively engaged in the creation of sustainable curation models, policies, and tool development. In addition, the parallel workshops on GO, ontology development, data standards, machine learning and natural language processing (NLP) also complemented our curation jamboree. We also had limited resources and time. Therefore, it made sense to conduct a local experiment, where we could provide maximum help to participants. In the future, depending upon the availability of financial resources, we can attempt hosting a similar workshop at a larger conference venue to recruit plant researchers.

The 2017 jamboree participants were mostly senior faculty. We faced the challenge of retaining these participants for a full day (as other workshops/lecture sessions were running in parallel). These participants learned how Plant Reactome could be useful for their research projects, but could not commit their full attention to biocuration due to other conference commitments. Learning from this experience, we designed a more flexible schedule for the 2018 jamboree, spread over four days. Prior to the jamboree, our curators interacted with local laboratories, learned about their research projects and needs, introduced the utility of Plant Reactome, and recruited participants. In addition, we sent a pre-survey form to all registered participants and adapted our strategy and workflow on the basis of their responses. We also sent a video tutorial, a simple pathway curation protocol, and a list of selected research articles to registered participants.

In the 2018 Pathway Biocuration Jamboree, we had 50% local and 50% outside registrants. In general, local graduate students committed 50-100% of their time to biocuration, whereas, the randomly registered participants did not commit enough time, or chose to attend other workshops. The participant graduate students found our approach to a critical review of the literature, hypothesis building, data organization, and analysis during biocuration exercises directly applicable to their own research projects. We were surprised by their sincere, dedicated efforts and time investment. The training of the local group of graduate students was accomplished at minimal cost and served as a primer for how best to structure and organize biocuration jamborees for a wider community of researchers.

We suggest that engaging graduate students early on in biocuration activities will lay a foundation for building a community of researchers who can proactively format their research data for easy integration into public databases. If incorporated in the graduate school curriculum, biocuration training could be beneficial to students and simultaneously increase the community’s contribution to biocuration of public databases.

The support and motivation to train and engage biology researchers in biocuration could also come from publishers, and/or from collaborative efforts of public databases, and societies. For example, Scientific Data, a research journal published by Nature Publishing Group, has taken an initiative to engage authors in metadata curation prior to publication and to provide specific templates for furnishing the required information (30).

**Conclusion**

We benefited tremendously from the participation of active researchers in two pathway curation jamborees. We learned where gaps exist between bioinformatics resources and the needs of researchers. Depending upon the availability of resources and funding, we will continue our efforts to engage the plant genomic community in biocuration and collaborate with other institutions/publicly-funded projects in such activities. We look forward to engaging graduate students, postdocs and researchers from local, national, and international institutions. We welcome researchers who would like to directly contribute to plant pathway curation. Researchers can curate/edit pathways using PathVisio in WikiPathways and provide a summary with citations. Our curators can import and adapt pathways from WikiPathways to Plant Reactome with lesser effort. Alternatively, researchers can also send pathway drawings and summaries to Plant Reactome curators directly or volunteer as a reviewer for curated pathways. We also welcome one-on-one training (online, at conferences, or site visits) depending on the availability of funds.

Gramene in collaboration with CyVerse and the Texas Advanced Computing Center is also working with American Society of Plant Biology (ASPB) to engage authors in data curation. The ASPB’s two high impact journals The Plant Cell and Plant Physiology have developed an NLP-based biocuration and author engagement workflow that is activated at the time of author-proof validation step. This workflow uses Domain Informational Vocabulary Extraction (DIVE) and requests edits and validation from authors. This effort is funded by the US National Science Foundation. Such support and structured requirements from publishers will train researchers in aspects of biocuration and would allow for better integration of data from research articles into public databases.

The investment of various stakeholders (academia, industry, educators, scientific societies, and publishers) in engaging and training the broader research community in biocuration will provide a sustainable and quality solution for keeping pace with the Big Data explosion. We hope that Plant Reactome’s efforts in engaging the user community in biocuration can help other databases to effectively strategize and plan similar workshops. Acquiring Big Data literacy and biocuration skills are important incentives for researchers. Such exercises could help young researchers to think more critically about their own project, train in using relevant tools and resources, and engage with the broader scientific community.

Finally, we agree with the suggestions made earlier by Howe *et al.* (18) and reiterate that community curation will be sustainable when individuals are appropriately rewarded for their work; granting agencies recognize community curation as an outreach component, and institutions include it as an acceptable service component when making tenure decisions. Community curation efforts without the supervision of trained curators are less likely to be productive and sustainable. Professional curators will remain as the backbone of quality biocuration by i) recruiting, training, and supporting the community; ii) reviewing the work submitted by community curators; iii) developing new protocols for curation, software development and testing; and iv) outreach.

**Funding**

This work was supported by National Science Foundation (NSF IOS-1127112) to Gramene database project and National Institutes of Health (NIH: P41 HG003751) to Human Reactome project.

**Acknowledgements**

We thank Peter D’Eustachio (Reactome project) for training Plant Reactome curators, providing suggestions on this manuscript, and his guidance in organizing the 2017 pathway curation Jamboree. We acknowledge technical support provided by Guanming Wu and Justin Elser. We thank all 2017 and 2018 jamboree participants. We thank a volunteer community curator, Bijayalaxmi Mohanty for compiling the list of 75 rice genes that are transcriptionally regulated in response to cold that we used in the curation workshop for writing/testing a script for automatic mapping of MSU gene IDs to RAP gene IDs and corresponding UniProt IDs.

**Conflict of interest**

None declared.

**Legends to the figures**

**Figure 1.** A general summary of the genomics pipeline depicting ‘Big Data’ generation, handling, analysis and its potential translation. The development of cyberinfrastructure and analysis tools is ongoing for storage, analysis and visualization of the raw and processed data simultaneously to make it available for integration across various public platforms using the FAIR (Findable, Accessible, Interoperable, and Reusable) principle. A genomic knowledgebase such as Plant Reactome represents the downstream end of this pipeline, which can directly support the generation of a data-driven hypothesis for translation of biological knowledge.

**References**

1. Tello-Ruiz, M.K., Naithani, S., Stein, J.C., Gupta, P., Campbell, M., Olson, A., Wei, S., Preece, J., Geniza, M.J., Jiao, Y. *et al.* (2018) Gramene 2018: unifying comparative genomics and pathway resources for plant research. *Nucleic Acids Res*, **46**, D1181-D1189.

2. Goodstein, D.M., Shu, S., Howson, R., Neupane, R., Hayes, R.D., Fazo, J., Mitros, T., Dirks, W., Hellsten, U., Putnam, N. *et al.* (2012) Phytozome: a comparative platform for green plant genomics. *Nucleic Acids Res*, **40**, D1178-1186.

3. Kanehisa, M., Furumichi, M., Tanabe, M., Sato, Y. and Morishima, K. (2017) KEGG: new perspectives on genomes, pathways, diseases and drugs. *Nucleic Acids Res*, **45**, D353-D361.

4. Fabregat, A., Korninger, F., Viteri, G., Sidiropoulos, K., Marin-Garcia, P., Ping, P., Wu, G., Stein, L., D'Eustachio, P. and Hermjakob, H. (2018) Reactome graph database: Efficient access to complex pathway data. *PLoS Comput Biol*, **14**, e1005968.

5. Naithani, S., Preece, J., D'Eustachio, P., Gupta, P., Amarasinghe, V., Dharmawardhana, P.D., Wu, G., Fabregat, A., Elser, J.L., Weiser, J. *et al.* (2017) Plant Reactome: a resource for plant pathways and comparative analysis. *Nucleic Acids Res*, **45**, D1029-D1039.

6. Caspi, R., Billington, R., Ferrer, L., Foerster, H., Fulcher, C.A., Keseler, I.M., Kothari, A., Krummenacker, M., Latendresse, M., Mueller, L.A. *et al.* (2016) The MetaCyc database of metabolic pathways and enzymes and the BioCyc collection of pathway/genome databases. *Nucleic Acids Res*, **44**, D471-480.

7. Schlapfer, P., Zhang, P., Wang, C., Kim, T., Banf, M., Chae, L., Dreher, K., Chavali, A.K., Nilo-Poyanco, R., Bernard, T. *et al.* (2017) Genome-Wide Prediction of Metabolic Enzymes, Pathways, and Gene Clusters in Plants. *Plant Physiol.*, **173**, 2041-2059.

8. Dharmawardhana, P., Ren, L., Amarasinghe, V., Monaco, M.K., Thomason, J., Ravenscroft, D., McCouch, S.R., Ware, D. and Jaiswal, P. (2013) A genome scale metabolic network for rice and accompanying analysis of tryptophan, auxin and serotonin biosynthesis regulation under biotic stress. *Rice*, **6**, 1-15.

9. Monaco, M.K., Sen, T.Z., Dharmawardhana, P.D., Ren, L., Schaeffer, M., Naithani, S., Amarasinghe, V., Thomason, J., Harper, L., Gardiner, J. *et al.* (2013) Maize Metabolic Network Construction and Transcriptome Analysis. *Plant Genome*, **6**, 1-12.

10. Naithani, S., Raja, R., Waddell, E.N., Elser, J., Gouthu, S., Deluc, L.G. and Jaiswal, P. (2014) VitisCyc: a metabolic pathway knowledgebase for grapevine (Vitis vinifera). *Front Plant Sci*, **5**, 644.

11. Naithani, S., Partipilo, C.M., Raja, R., Elser, J.L. and Jaiswal, P. (2016) FragariaCyc: A Metabolic Pathway Database for Woodland Strawberry Fragaria vesca. *Front Plant Sci*, **7**, 242.

12. Odella, S.G., Lazo, G.R., Woodhousea, M.R., Hanea, D.L. and Sen, T.Z. (2017) The art of curation at a biological database: Principles and application. *Curr Plant Biol.*, **11-12**, 2-11.

13. Waagmeester, A.S., Kelder, T. and Evelo, C.T. (2008) The role of bioinformatics in pathway curation. *Genes Nutr*, **3**, 139-142.

14. Adriaens, M.E., Jaillard, M., Waagmeester, A., Coort, S.L., Pico, A.R. and Evelo, C.T. (2008) The public road to high-quality curated biological pathways. *Drug Discov. Today*, **13**, 856-862.

15. Bourne, P.E., Lorsch, J.R. and Green, E.D. (2015) Perspective: Sustaining the big-data ecosystem. *Nature*, **527**, S16-17.

16. Karp, P.D. (2016) How much does curation cost? *Database (Oxford)*, **2016**.

17. Rodriguez-Esteban, R. (2015) Biocuration with insufficient resources and fixed timelines. *Database (Oxford)*, **2015**.

18. Howe, D., Costanzo, M., Fey, P., Gojobori, T., Hannick, L., Hide, W., Hill, D.P., Kania, R., Schaeffer, M., St Pierre, S. *et al.* (2008) Big data: The future of biocuration. *Nature*, **455**, 47-50.

19. Tello-Ruiz, M.K., Stein, J., Wei, S., Preece, J., Olson, A., Naithani, S., Amarasinghe, V., Dharmawardhana, P., Jiao, Y., Mulvaney, J. *et al.* (2016) Gramene 2016: comparative plant genomics and pathway resources. *Nucleic Acids Res*, **44**, D1133-1140.

20. Cooper, L., Meier, A., Laporte, M.A., Elser, J.L., Mungall, C., Sinn, B.T., Cavaliere, D., Carbon, S., Dunn, N.A., Smith, B. *et al.* (2018) The Planteome database: an integrated resource for reference ontologies, plant genomics and phenomics. *Nucleic Acids Res*, **46**, D1168-D1180.

21. Wei, C.H., Kao, H.Y. and Lu, Z. (2013) PubTator: a web-based text mining tool for assisting biocuration. *Nucleic Acids Res*, **41**, W518-522.

22. Khare, R., Wei, C.H., Mao, Y., Leaman, R. and Lu, Z. (2014) tmBioC: improving interoperability of text-mining tools with BioC. *Database (Oxford)*, **2014**.

23. Muller, H.M., Van Auken, K.M., Li, Y. and Sternberg, P.W. (2018) Textpresso Central: a customizable platform for searching, text mining, viewing, and curating biomedical literature. *BMC Bioinformatics*, **19**, 94.

24. Adam-Blondon, A.F., Alaux, M., Pommier, C., Cantu, D., Cheng, Z.M., Cramer, G.R., Davies, C., Delrot, S., Deluc, L., Di Gaspero, G. *et al.* (2016) Towards an open grapevine information system. *Hortic Res*, **3**, 16056.

25. Harper, L., Campbell, J., Cannon, E.K.S., Jung, S., Poelchau, M., Walls, R., Andorf, C., Arnaud, E., Berardini, T., Birkett, C. *et al.* (2018) AgBioData Consortium Recommendations for Sustainable Genomics and Genetics Databases for Agriculture. *Database (Oxford)*, **(accepted)**.

26. International Rice Genome Sequencing, P. (2005) The map-based sequence of the rice genome. *Nature*, **436**, 793-800.

27. Ouyang, S., Zhu, W., Hamilton, J., Lin, H., Campbell, M., Childs, K., Thibaud-Nissen, F., Malek, R.L., Lee, Y., Zheng, L. *et al.* (2007) The TIGR Rice Genome Annotation Resource: improvements and new features. *Nucleic Acids Res*, **35**, D883-887.

28. Rice Annotation, P., Itoh, T., Tanaka, T., Barrero, R.A., Yamasaki, C., Fujii, Y., Hilton, P.B., Antonio, B.A., Aono, H., Apweiler, R. *et al.* (2007) Curated genome annotation of Oryza sativa ssp. japonica and comparative genome analysis with Arabidopsis thaliana. *Genome Res.*, **17**, 175-183.

29. Zhang, L., Yu, S., Zuo, K., Luo, L. and Tang, K. (2012) Identification of gene modules associated with drought response in rice by network-based analysis. *PLoS ONE*, **7**, e33748.

30. (2018) Open data, open curation. *Sci Data*, **5**, 180204.
