# Supplementary material for: Involving community in genes and pathway curation
Source: Oxford University Press journal article supplement (doi:10.1093/database/bay146), 2018-12-20
Supplement: bay146_supp.zip [file bay146_supp.zip › Naithani-et-al-Supplementary text_DATABASSE-2018.docx]

**Supplementary text**: In 2018, a Pathway Curation Jamboree was organized by Plant Reactome (<http://plantreactome.gramene.org>), the pathway portal of Gramene database ([www.gramene.org](http://www.gramene.org)). Here, we share some of the insights from the jamboree participants.

**Participant # 1:**

“The Pathway Jamboree was very useful for learning about available resources for pathway curation. Following the process from literature review to functional annotations showed the limitations of available gene/genome annotations and how heterogeneous data about specific genes can be reconciled. For those of us working on non-model organisms, this experience was a good entry point from which we may think about how to apply or cross-reference gene model annotations, and ultimately develop taxon-specific pathway resources.”

**Participant #2**:

“During the Jamboree, I spent approximately 7 hours each day learning about and working on curation for plant pathways, and I contributed to the curation of an endosperm development pathway consisting of 30 genes from 2 published articles. I learned about the curation process and about several tools available that make curation and visualization of gene data less complicated than it sounds. Much of what I learned here will be useful for my own research down the road, and the interpersonal connections I made here are already beneficial for me.”

**Participant #3**:

“I really liked the jamboree this time as this was more structured and detailed version of the curation process training. We were facilitated with a personalized guidance to go through the complex process of the curation of developmental pathways. To my surprise, the curation approach for developmental pathways is markedly different from curation of metabolic pathways. I was one of the participants in last jamboree as well, which was a short version of this workshop. The amount of the information conveyed this time was certainly greater than the previous workshop. The sessions were more streamlined and I really liked the approach to start with an overview of the whole workflow and then to proceed with the details of each of data entry points, mentioned in the workflow. It actually provided a deeper understanding of the curation pipeline at a granular level. Being a curator I am aware of the complexity of the curation process, which deters people from contributing in this important area of data science.  I think we can encourage more people to join this community by organizing similar workshops as they can serve as starting point for the researchers who want to implement the idea of curation in their respective field and need someone to guide them in the right direction. These workshops could also be used as the opportunity to motivate naive and curious curators to become domain expert curator by providing the intricate knowledge about crucial curation processes.”

**Participant #4**:

**“**I work in a non-model species hop (*Humulus lupulus*).During the Pathway Curation Jamboree, I worked with model species rice and learned how the standardization of gene names is critical for pathway mapping. I attained a better sense of how different sources of evidence complement each other, and how to proceed forward when not all sources of evidence are available. I found it very useful to draw diagrams to begin the process of mapping pathways and to learn about Reactome Curator Tool. This exercise provided a foundation to work with hop genome annotations and build genomic resources for the non-model plant species.”

**Participant #5:**

“My experience at the workshop was positive. I was able to learn the workflow and tools required for pathway curation. This could prove very useful for my own research later if I discover novel connections between pathways. Now, I would have a foundation I could use to get my findings included in Plant Reactome. This would allow for these findings to be distributed to a broader community of researchers.”

**Participant #6:**

“From the Pathway Jamboree, I was able to get an idea of the amount of time and work it takes to completely annotate genes, its attributes and its proposed role in a pathway. The process requires a thorough review of literature, which is long and severely understaffed. There is so much genetic and molecular information that is just buried in published literature and is hard to access and utilize in new studies and experiment. The Jamboree itself was well set-up and executed; the fluid structure of the workshop allows attendees to work when they could instead of feeling tied down to one workshop in a conference setting. I recommend this type of workshop in pathway annotation to be more accessible to (1) young scientists to learn how to critically read literature and avail other public resources, and (2) publishing authors to make their data more applicable and available to the global scientific community.”
