# Supplementary figures and images for: Involving community in genes and pathway curation
Source: Oxford University Press journal article supplement (doi:10.1093/database/bay146), 2018-12-20

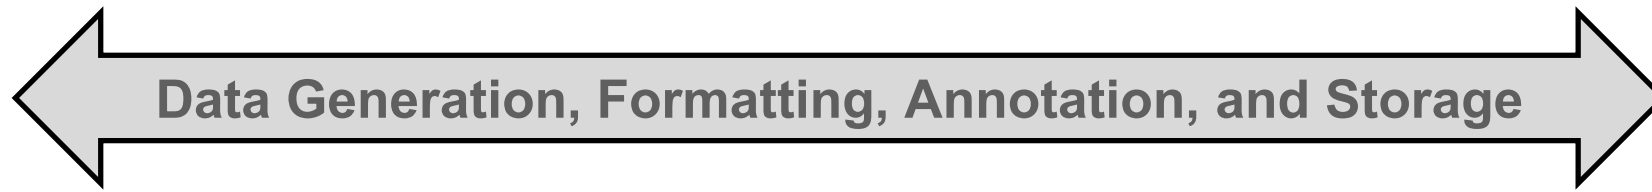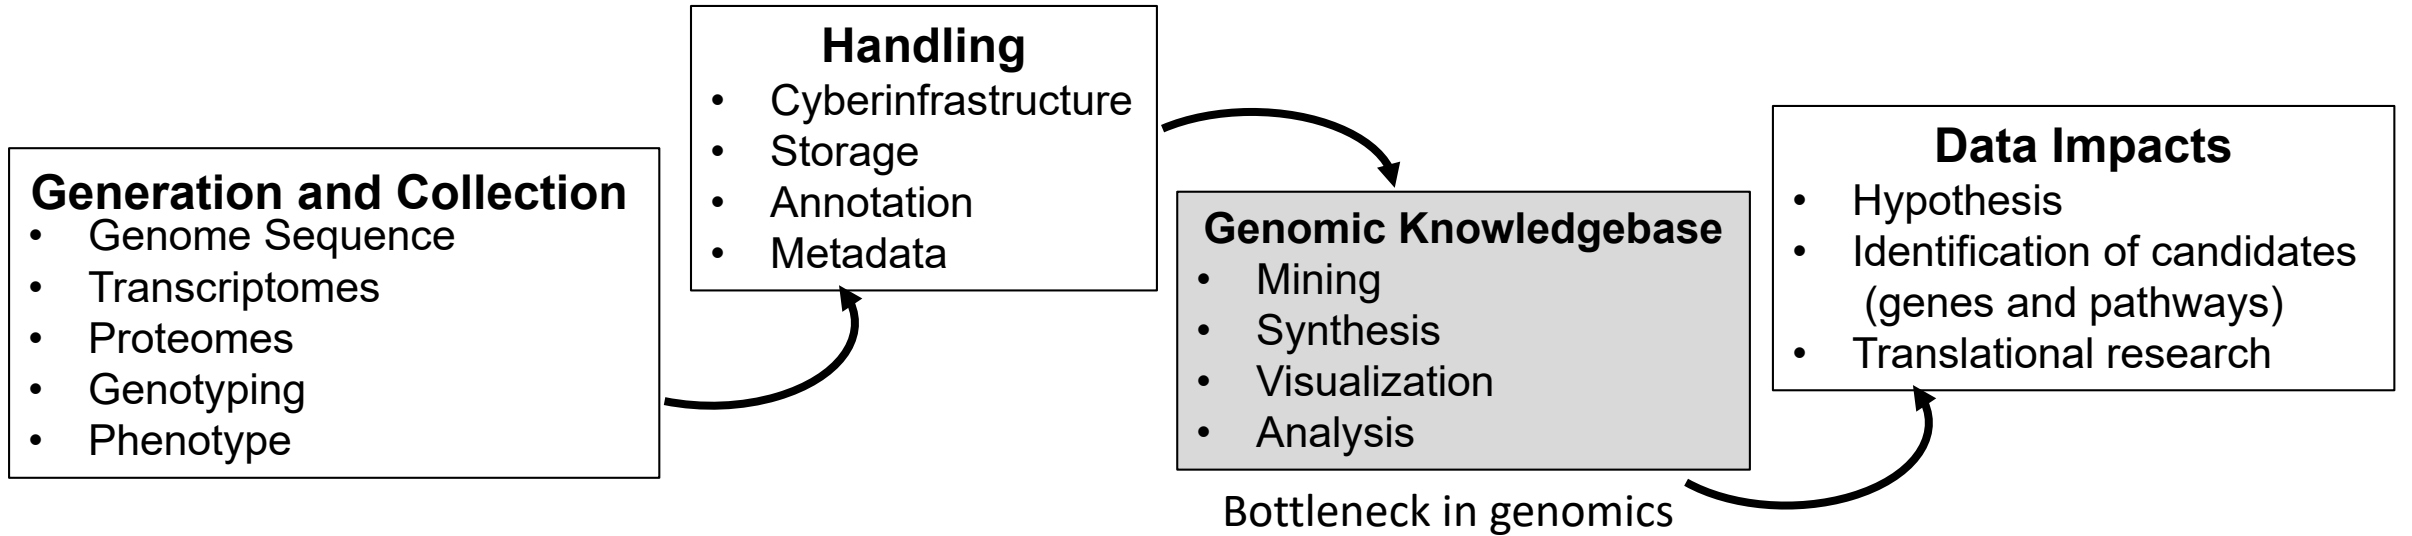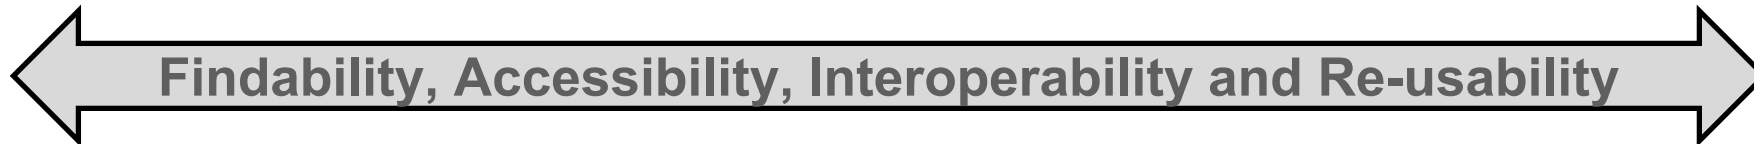

Figure 1.

Supplement: bay146_supp.zip [file bay146_supp.zip › Naithani-et-al-Figure1_09-05-2018.pdf]
